# Supplementary material for: GalNAc Conjugation Attenuates the Cytotoxicity of Antisense Oligonucleotide Drugs in Renal Tubular Cells
Source: PubMed Central journal article supplement — Mol Ther Nucleic Acids. 2018 Nov 20;14:67–79. doi: 10.1016/j.omtn.2018.11.005 (PMC6305803; doi:10.1016/j.omtn.2018.11.005), 2018-11-20
Supplement: mmc1.pdf [file mmc1.pdf]

**OMTN, Volume 14**

## **Supplemental Information**

### **GalNAc Conjugation Attenuates the Cytotoxicity of Antisense Oligonucleotide Drugs in Renal Tubular Cells**

**Sabine Sewing, Marcel Gubler, Régine Gérard, Blandine Avignon, Yasmin  
Mueller, Annamaria Braendli-Baiocco, Marielle Odin, and Annie Moisan**

## **SUPPLEMENTARY MATERIAL**

Figure S1. Additional examples of preclinical testing of GalNAc-AON libraries in vitro

Table S1. List of AONs with corresponding sequences and backbone modifications

Table S2. Capture and detection probes for hybridization ELISA detection of AONs

**a**

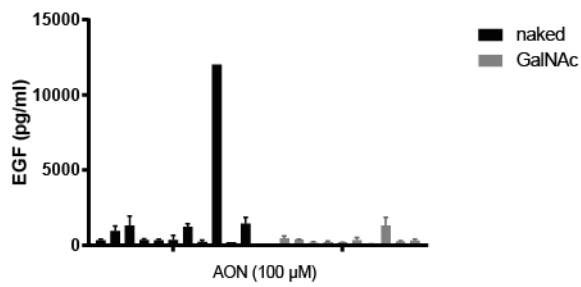

**b**

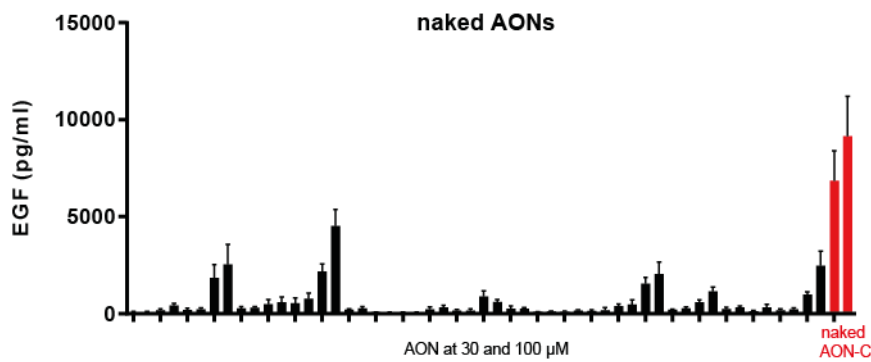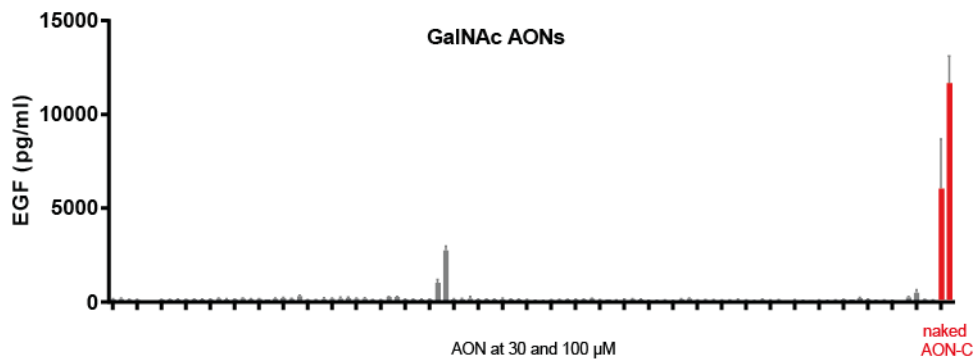

**Fig. S1** Preclinical safety testing of naked and GalNAc-AON libraries in PTEC. **(a-b)** Measurement of EGF in the supernatant of PTEC cells treated for 6 days with naked or GalNAc AON libraries, revealing a generally reduced cytotoxicity effect of GalNAc-conjugated AONs compare to naked AONs. **(a)** Matched pairs of naked and GalNAc AONs sharing the same oligonucleotide sequence were tested at 100  $\mu$ M. **(b)** Libraries of naked (upper panel) and GalNAc (lower panel) AONs designed against the same target gene but consisting of different oligonucleotide sequences were tested at 30 and 100  $\mu$ M. Naked AON-C was included as a toxic AON control. Data represent means and SD (n=3).

Table S1. List of AONs with corresponding sequences and backbone modifications

| AON | Target   | Conjugation                | Sequence (5' to 3')                                                 |
|-----|----------|----------------------------|---------------------------------------------------------------------|
| A   | Scramble | none (naked)               | <sup>m</sup> CGTcagtatgcgAATc                                       |
|     |          | GalNAc                     | 5'-GN2-C6ca <sup>m</sup> CGTcagtatgcgAATc                           |
| B   | PCSK9    | none (naked)               | TG <sup>m</sup> Ctacaaaac <sup>m</sup> C <sup>m</sup> CA            |
|     |          | GalNAc                     | 5'-GN2-C6caTG <sup>m</sup> Ctacaaaac <sup>m</sup> C <sup>m</sup> CA |
|     |          | GalNAc, uncleavable linker | 5'-GN2-C6T <sup>m</sup> Ctacaaaac <sup>m</sup> C <sup>m</sup> CA    |
| C   | PCSK9    | none (naked)               | G <sup>m</sup> CtgtgtgagcttGG                                       |
|     |          | GalNAc                     | 5'-GN2-C6caG <sup>m</sup> CtgtgtgagcttGG                            |

Single strand oligonucleotide sequence is indicated in blue font

Uppercase: Wing segments of nucleotides with locked nucleic acid (LNA) sugar modifications. <sup>m</sup>C: 5-methylcytidine.  
Lower case: Gap segment of 2'-deoxynucleotides.  
Internucleotide linkages are phosphorothioated.

5'-GN2: N-acetylgalactosamine (GalNAc).  
Molecular weight: 1476.5 g/mol  
Empirical formula: C60H106N7O33.Na.

C6ca: triantennary linker  
C6T: uncleavable triantennary linker

Table S2. Capture and detection probes for hybridization ELISA detection of AONs

| AON | Detection probe    | Capture probe      |
|-----|--------------------|--------------------|
| A   | 5'-DIG-GATTCGCA-3' | 5'-TACTGACG-BIO-3' |
| B   | 5'-DIG-TGGGTTT-3'  | 5'-TGTAGCA-BIO-3'  |
| C   | 5'-DIG-CCAAGCTC-3' | 5'-ACACAGC-BIO-3'  |
